# Supplementary material
Source: HighWire-hosted journal article supplement (https://bmjopen.bmj.com/content/12/2/e056130)
Supplement: inline-supplementary-material-1 [file inline-supplementary-material-1.pdf]

## Supplementary File 1 - Eligibility Criteria

**Question 1: Does this study include humans?**

- a) If yes, **INCLUDE**
- b) **EXCLUDE** animal studies/models, non-humans or vertebrae studies

**Question 2: Is the primary language of the study English?****Is the primary language of the study English?**

- a) If yes, **INCLUDE**
- b) **EXCLUDE** if study is listed as described in a non-English language

**Question 3: Is the article classified as one of the following?**

- a) **INCLUDE** all types of study designs including, observational studies, experimental studies, qualitative studies, study protocols, grey literature.
- b) **EXCLUDE:** systematic reviews, meta-analysis, letter to editors, scoping reviews, commentaries, news articles

**Question 4: Does this study examine care provided to pregnant women with Preeclampsia/eclampsia (PE/E)/or at high risk for PE/E (HRPE/E)?**

- a) If yes, **INCLUDE**
- b) **EXCLUDE** if study does not focus on care provided to pregnant women with PE/E or at HRPE/E

**Question 5: Does this study examine digital technologies to support pregnant women with preeclampsia/eclampsia or at HRPE/E**

- a) **INCLUDE** studies that are focused on use of digital technologies to support pregnant women with PE/E or at HRPE/E. Digital technologies may include:
  - Telephone communication
  - Video communication
  - Text messaging (asynchronous)
  - Email messaging (asynchronous)
  - Portals, apps, and other applications
  - Remote monitoring

- Devices
  - Predictive models
  - Provider-provider communication through one of the above modalities
    - Synonyms: digital health, virtual care, virtual visits, eVisits, telehealth, telemedicine, eConsultation, mobile health, mHealth, teleconsultation, teleconference, telecommunications, tele\* (e.g., telepsychiatry, teledermatology, etc), videoconferencing, video visits, phone, telephone, electronic consultation, online consultation, e-mail, text messaging, asynchronous messaging, secure messaging, direct messaging, messaging
- b) **INCLUDE** studies focused on using digital technologies for early diagnosis, screening, and management of pregnant women with PE/E or HRPE/E.
- c) **INCLUDE** studies that used digital technologies to support pregnant women with PE/E or at HRPE/E
- d) **EXCLUDE** studies focused on digital health interventions that do not explicitly focus on pregnant women with PE/E or HRPE/E

#### Question 7: Is this study based on low-and-middle-income contexts?

See list of countries by income classification here: <https://data.worldbank.org/country/XN>

- a) If yes, **INCLUDE**
- b) **INCLUDE** if study focused on high and middle income together.
- c) **EXCLUDE** if based on only high-income country context
