# Supplementary material
Source: HighWire-hosted journal article supplement (https://bmjopen.bmj.com/content/12/2/e056130)
Supplement: inline-supplementary-material-2 [file inline-supplementary-material-2.pdf]

## Supplementary File 2 - Search Strategy

1. Pregnant Women/
2. exp pregnancy/
3. (pregnan\* adj3 ("at risk" or "at-risk" or "high risk" or "high-risk")).tw,kw.
4. exp Eclampsia/
5. exp Pre-Eclampsia/
6. (Pre Eclampsia or preeclampsia or pre-eclampsia or pre eclampsia or eclampsia or gestosis or proteinuria or toxemia\*).tw,kw.
7. or/1-6
8. Telemedicine/
9. Medical informatics/
10. Digital health.mp.
11. mHealth app.mp.
12. predictive model.mp.
13. CLIP.mp.
14. informatics/
15. exp Telecommunications/
16. Monitoring, Ambulatory/
17. exp Telemetry/
18. Monitoring, Physiologic/
19. exp Computer Communication Networks/
20. Mobile Applications/
21. Smartphone/
22. Cell Phone/
23. (tele-monitor\* or telemonitor\* or telemed\* or tele-med\* or teleinterpret\* or tele-interpret\* or telecomm\* or tele-comm\* or telemetry).tw,kw.
24. (mhealth\* or m-health\* or ehealth\* or e-health\* or telehealth\* or tele-health\*).tw,kw.
25. (mobile adj3 (health\* or technolog\* or app\* or solution\* or phone\* or communicat\*)).tw,kw.
26. (remote\* adj3 (transmi\* or transfer\* or tele\* or monitor\* or consult\* or follow-up or program\* or connect\* or web-base\* or "web base\*" or term)).tw,kw.
27. (monitor\* adj3 (home or remote or distan\* or ambulatory or tele\* or online or on-line or "on line" or phone or digital\* or Skype or electronic\* or implant\* or wireless\* or web-base\* or "web base\*")).tw,kw.
28. (interven\* adj3 (remote\* or distan\* or tele\* or online or on-line or "on line" or phone\* or digital\* or Skype or electronic\* or wireless\*)).tw,kw.
29. (smartphone\* or "smart phone\*" or bluetooth\* or Internet\* or phone\* or text messag\*).tw,kw.
30. ((app or apps or application\*) adj3 (mobile or electronic or software)).tw,kw.
31. ((digital\* or electronic\* or online\* or on-line\* or "on line" or Internet) adj3 (health\* or solution\* or transmit\* or transmiss\* or transfer\* or device\* or connect\*)).tw,kw.
32. (broadband adj3 (device\* or capab\*)).tw,kw.
33. (multi-media\* or multimedia\*).tw,kw.
34. (self monitor\* or self-monitor\*).tw,kw.
35. or/8-34
36. 7 and 35
37. developing countries/
38. low-and-middle-income countries.mp.
39. LMICs
40. Honduras/
41. Angola/
42. Papua New Guinea/
43. Algeria/
44. India/
45. Philippines/

46. Bangladesh/
47. Kenya/
48. Sao Tome and Principe.mp.
49. Benin/
50. Kiribati.mp.
51. Senegal/
52. Bhutan/
53. Kyrgyzstan/
54. Solomon Islands.mp.
55. Bolivia/
56. Laos/
57. Sri Lanka/
58. Cabo Verde/
59. Lesotho/
60. Tanzania/
61. Cambodia/
62. Mauritania/
63. Timor-Leste/
64. Cameroon/
65. Micronesia/
66. Tunisia/
67. Comoros/
68. Moldova/
69. Ukraine/
70. "Democratic Republic of the Congo"/
71. Mongolia/
72. Uzbekistan
73. Cote d'Ivoire/
74. Morocco/
75. Vanuatu/
76. Djibouti/
77. Myanmar/
78. Vietnam/
79. Egypt/
80. Nepal/
81. West Bank and Gaza.mp.
82. El Salvador/
83. Nicaragua/
84. Zambia/
85. Eswatini/
86. Nigeria/
87. Zimbabwe/
88. Ghana/
89. Pakistan/
90. (Angola or Honduras or Papua New Guinea or Algeria or India or Philippines or Bangladesh or Kenya or Sao Tome and Principe or Benin or Kiribati or Senegal or Bhutan or Kyrgyz Republic or Solomon Islands or Bolivia or Lao PDR or Sri Lanka or Cabo Verde or Lesotho or Tanzania or Cambodia or Mauritania or Timor-Leste or Cameroon or Micronesia or Tunisia or Comoros or Moldova or Ukraine or Democratic Republic of the Congo or Mongolia or Uzbekistan or Cote d'Ivoire or Morocco or Vanuatu or Djibouti or Myanmar or Vietnam or Egypt or Nepal or West Bank and Gaza or El Salvador or Nicaragua or Zambia or Eswatini or Nigeria or Zimbabwe or Ghana or Pakistan).tw,kw.
91. or/37-90
92. 36 and 91

93. exp animals/ not humans.sh.
94. 92 not 93
95. remove duplicates from 94
