# Supplementary material
Source: HighWire-hosted journal article supplement (https://bmjopen.bmj.com/content/12/2/e056130)
Supplement: inline-supplementary-material-3 [file inline-supplementary-material-3.pdf]

### Supplementary File 3 - Data Abstraction Form

1. Author, year
2. Journal
3. Study design (observational, experimental, protocol paper)
4. Study setting/country (LMICs)
5. Study population/Health Condition (PW at HRPE/E)
6. Study Objective
7. Number of participants (Sample)
8. Study period
  - Duration of intervention
  - Duration of data collection
9. Digital health intervention (DHI) used
  - Type of DHI (Predicative model, mHealth applications, devices)
  - Intervention validation (Yes/No)
  - Targeted primary user of intervention (health care provider/pregnant women)
  - User training on use of digital health intervention (Yes/No)
  - Function of digital health intervention
10. Study outcomes
  - Maternal and fetal health outcomes
  - Intervention feasibility/usability/fidelity/acceptability
11. Framework/model used
12. Study limitations
13. Comments
